# Supplementary material for: Global decoupling of functional and phylogenetic diversity in plant communities
Source: Springer Nature journal article supplement (doi:10.1038/s41559-024-02589-0), 2024-12-03
Supplement: MOESM5 [file 41559_2024_2589_MOESM5_ESM.xlsx]

## Sheet: Sheet 1
var
