# Supplementary material for: Global decoupling of functional and phylogenetic diversity in plant communities
Source: Springer Nature journal article supplement (doi:10.1038/s41559-024-02589-0), 2024-12-03
Supplement: MOESM8 [file 41559_2024_2589_MOESM8_ESM.xlsx]

## Sheet: Fig6A
shape

## Sheet: Fig6B
shape
